# Supplementary material for: Kefir peptides alleviate high-fat diet-induced atherosclerosis by attenuating macrophage accumulation and oxidative stress in ApoE knockout mice
Source: PubMed Central journal article supplement (PMC7260220; doi:10.1038/s41598-020-65782-8), 2020-05-29
Supplement: 41598_2020_65782_MOESM1_ESM.pdf [file 41598_2020_65782_MOESM1_ESM.pdf]

**Supporting Information**

**Kefir peptides alleviate high-fat diet-induced atherosclerosis by attenuating macrophage accumulation and oxidative stress in *ApoE* knockout mice**

Min-Che Tung<sup>1,2,3†</sup>, Ying-Wei Lan<sup>1†</sup>, Hsin-Han Li<sup>1†</sup>, Hsiao-Ling Chen<sup>4</sup>, Sheng-Yi Chen<sup>1</sup>, Yu-Hsuan Chen<sup>1</sup>, Chi-Chien Lin<sup>5</sup>, Min-Yu Tu<sup>6,7,8</sup>, and Chuan-Mu Chen<sup>1,9\*</sup>

<sup>1</sup> Department of Life Sciences, and Ph.D. Program in Translational Medicine, National Chung Hsing University, Taichung 402, Taiwan;

<sup>2</sup> Department of Surgery, Tungs' Taichung Metro Harbor Hospital, Taichung 435, Taiwan;

<sup>3</sup> Graduate Institute of Clinical Medicine, Taipei Medical University, Taipei 110, Taiwan;

<sup>4</sup> Department of Bioresources, Da-Yeh University, Changhwa 515, Taiwan;

<sup>5</sup> Institute of Biomedical Sciences, National Chung Hsing University, Taichung 402, Taiwan;

<sup>6</sup> Aviation Physiology Research Laboratory, Kaohsiung Armed Forces General Hospital Gangshan Branch, Kaohsiung 820, Taiwan

<sup>7</sup> Department of Biomedical Engineering, Hungkuang University, Taichung 433, Taiwan

<sup>8</sup> College of Health and Nursing, Meiho University, Pingtung 912, Taiwan

<sup>9</sup> The iEGG and Animal Biotechnology Center, and the Rong Hsing Research Center for Translational Medicine, National Chung Hsing University, Taichung 402, Taiwan

**\*Corresponding author:** Chuan-Mu Chen, Ph.D.

Professor and Dean  
Department of Life Sciences,  
College of Life Sciences,  
National Chung Hsing University,  
No. 250, Kuo Kuang Road, Taichung 402, Taiwan  
Phone: 886-4-22856309; Fax: 886-4-22874740  
E-mail: [chchen1@dragon.nchu.edu.tw](mailto:chchen1@dragon.nchu.edu.tw)

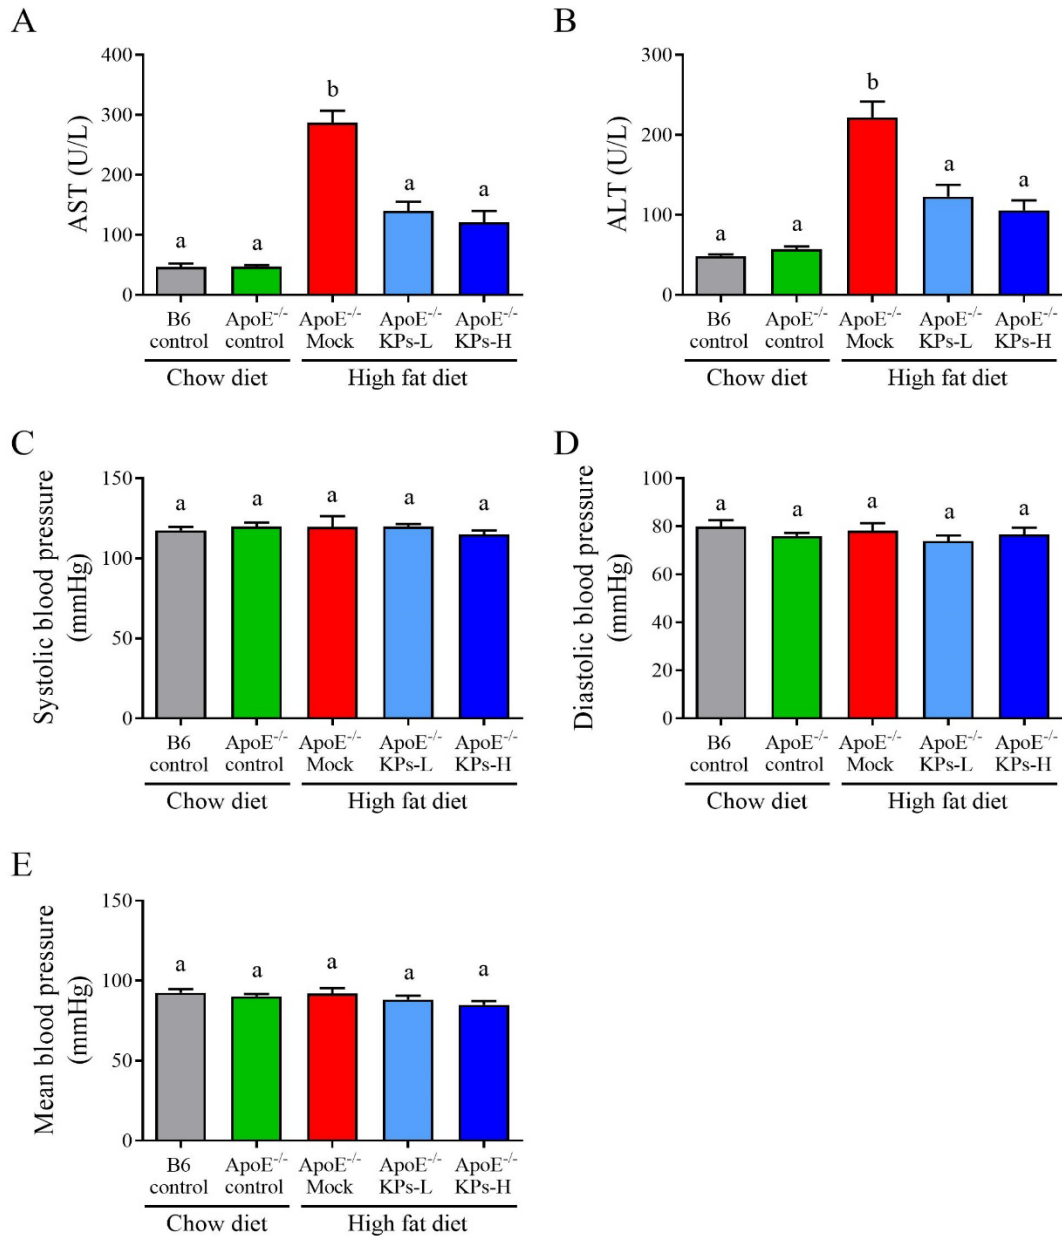

**Supplementary Figure 1. Effects of kefir peptides on liver damage markers and blood pressure in HDL-induced atherosclerotic *ApoE*<sup>-/-</sup> mice.** (A) Blood aspartate aminotransferase (AST) and (B) alanine aminotransferase (ALT) were measured by using a VetTest™ automatic colorimetrically analyzer. (C) Systolic blood pressure (SBP), (D) diastolic blood pressure (DBP), and (E) mean blood pressure (MBP) were measured by the Tail-Cuff detection system (BP-98A, Softron, Tokyo, Japan). Data are displayed as the mean ± SEM (n = 8). The labels at the top of columns without the same letters indicate significant differences between groups (P < 0.05).

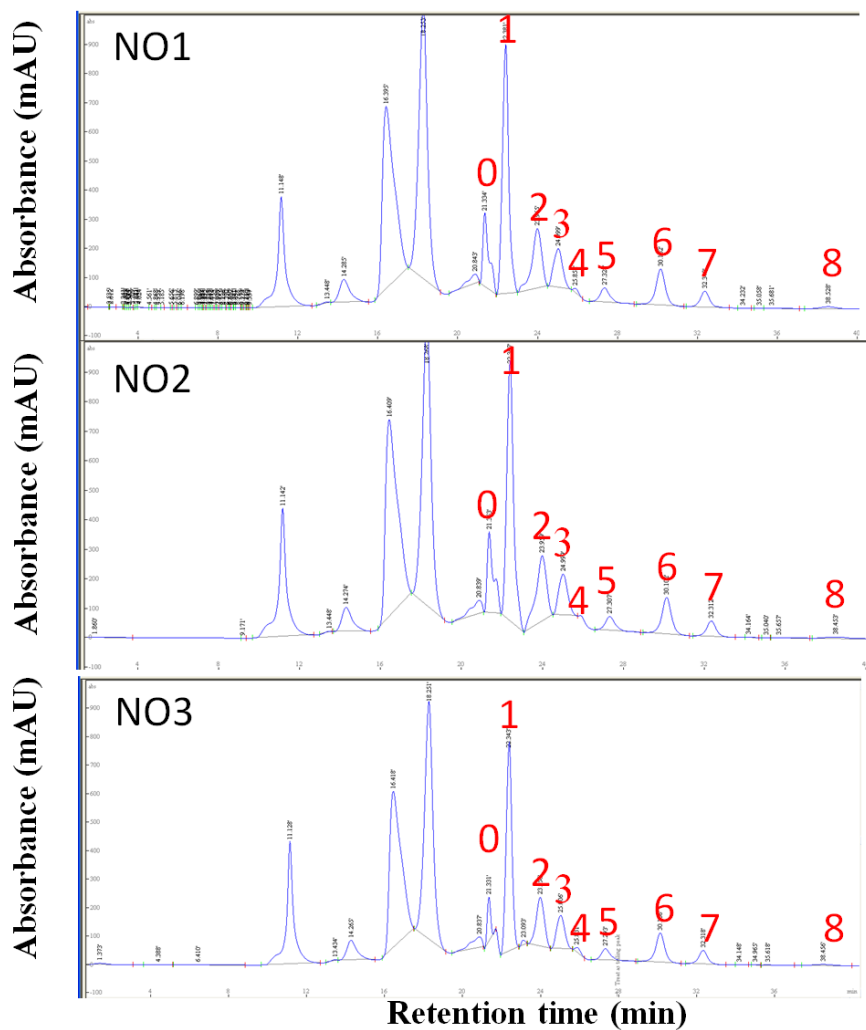

**Supplementary Figure 2. The quality controls of kefir peptides powder for the peptides separation and reproducibility.** They were separated by semipreparative HPLC on a model PU-980 pump (Jasco, Japan) equipped with a UV detector and a 300 x 7.8 mm i.d., 5- $\mu$ m particles TSK-GEL G2000SWXL column (Sigma-Aldrich, St Louis, MO). The mobile phase was 100 mM KH<sub>2</sub>PO<sub>4</sub>, 1 M NaCl and 1 mM EDTA (pH = 6.5) at a flow rate of 0.5 mL/min, and the wavelength was detected at 215 nm.

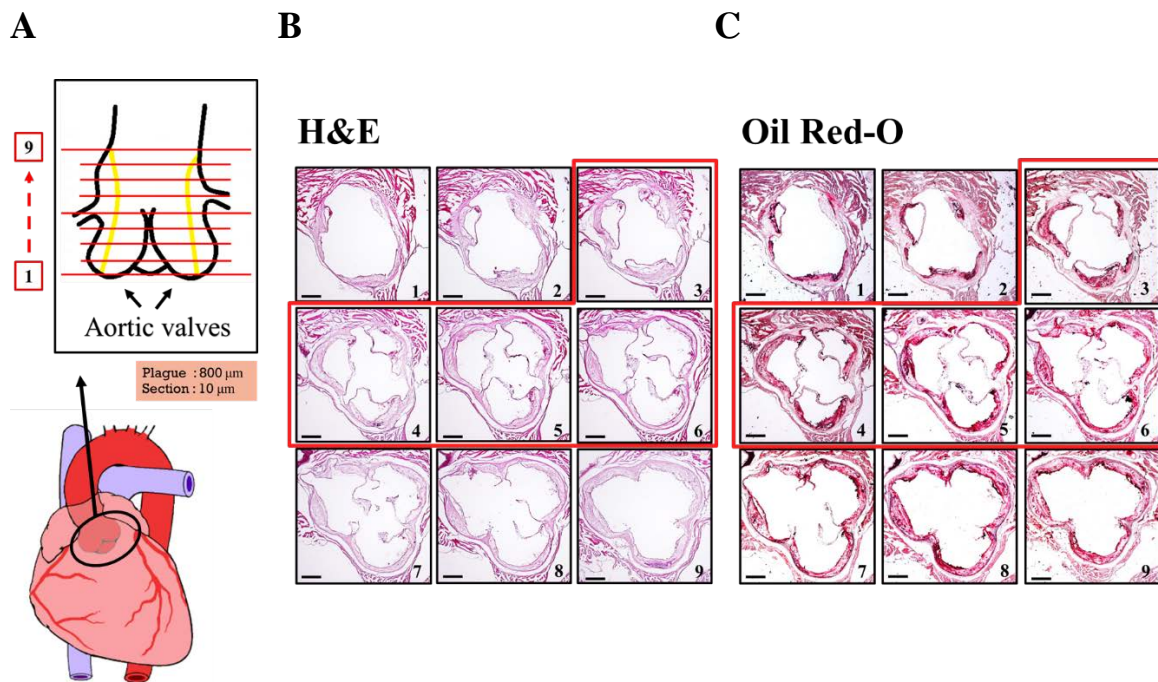

**Supplementary Figure 3. Schematic images of aorta continuously serial sections for plaque formation examination in HFD-induced atherosclerotic *ApoE*<sup>-/-</sup> mic.** The accumulation of lipid in the aortic roots of *ApoE*<sup>-/-</sup> mice was observed by Oil red-O staining and counterstained with H&E. Scale bars: 200  $\mu\text{m}$ . **(A)** The relative dissection position of mouse aortic root in the anatomy view. **(B)** The H&E staining of 9 continuously serial sections from the root to ascending aortic region. **(C)** The Oil red-O staining of 9 continuously serial sections from the root to ascending aortic region. The middle of 4 sections labeled by red box (slides 3-6) were used to quantify the Oil red-O-positive staining area.

Figure 3A. Raw data

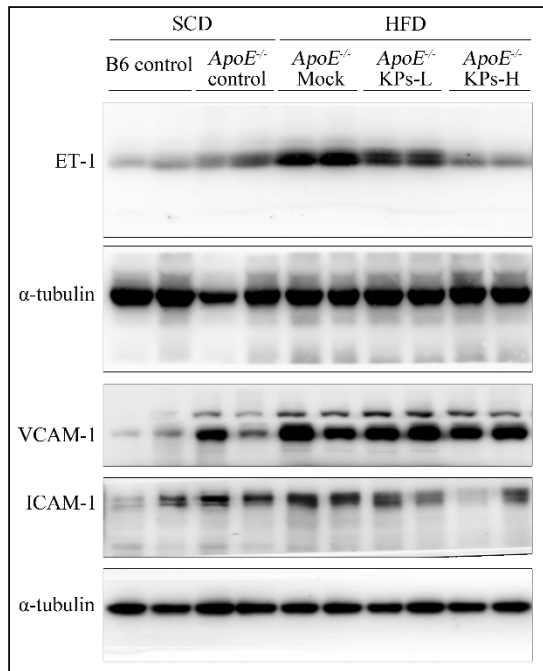

Figure 5E. Raw data

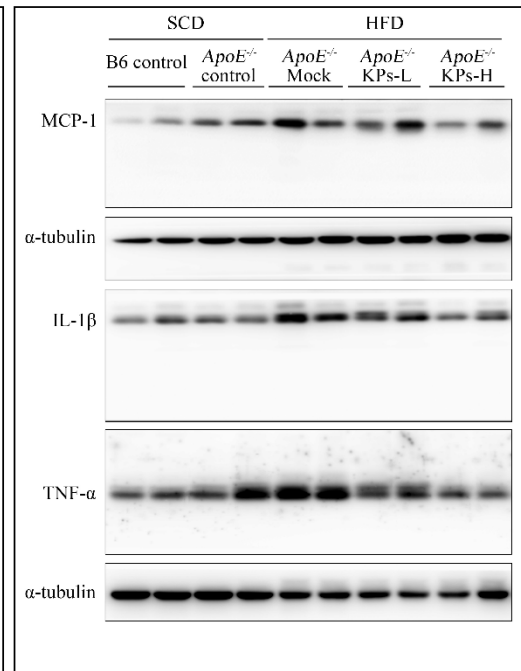

Figure 6D. Raw data

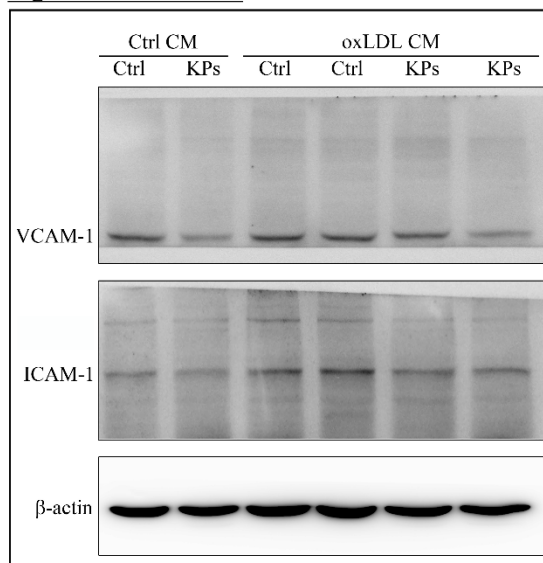

Supplementary Figure 4. Western blot raw data for Fig. 3A, Fig. 5E, and Fig. 6D.
